1 **Pediatric Cancer Variant Pathogenicity Information Exchange**  
2 **(PeCanPIE): A Cloud-based Platform for Curating and**  
3 **Classifying Germline Variants**

4 Michael N. Edmonson,<sup>1,5</sup> Aman N. Patel,<sup>1,5</sup> Dale J. Hedges,<sup>1</sup> Zhaoming Wang,<sup>1</sup> Evadnie  
5 Rampersaud,<sup>1</sup> Chimene A. Kesserwan,<sup>2</sup> Xin Zhou,<sup>1</sup> Yanling Liu,<sup>1</sup> Scott Newman,<sup>1</sup> Michael C.  
6 Rusch,<sup>1</sup> Clay L. McLeod,<sup>1</sup> Mark R. Wilkinson,<sup>1</sup> Stephen V. Rice,<sup>1</sup> Jared B. Becksfort,<sup>1</sup> Kim E.  
7 Nichols,<sup>2</sup> Leslie L. Robison,<sup>3</sup> James R. Downing,<sup>4</sup> and Jinghui Zhang<sup>1</sup>

8 <sup>1</sup>Department of Computational Biology, St. Jude Children's Research Hospital, Memphis, TN  
9 38105, USA; <sup>2</sup>Department of Oncology, St. Jude Children's Research Hospital, Memphis, TN  
10 38105, USA; <sup>3</sup>Department of Epidemiology & Cancer Control, St. Jude Children's Research  
11 Hospital, Memphis, TN 38105, USA; <sup>4</sup>Department of Pathology, St. Jude Children's Research  
12 Hospital, Memphis, TN 38105, USA

13 <sup>5</sup>These authors contributed equally to this work

14 \* Corresponding author: [Jinghui.Zhang@stjude.org](mailto:Jinghui.Zhang@stjude.org)

15 Running title: PeCanPIE: cloud-based variant classification

16 Keywords: germline, variant, cancer, pathogenicity, ACMG, classification, cloud

17

## 18 **Abstract**

19 Variant interpretation in the era of next-generation sequencing (NGS) is challenging. While  
20 many resources and guidelines are available to assist with this task, few integrated end-to-end  
21 tools exist. Here we present “PeCanPIE” – the Pediatric Cancer Variant Pathogenicity  
22 Information Exchange, a web- and cloud-based platform for annotation, identification, and  
23 classification of variations in known or putative disease genes. Starting from a set of variants in  
24 Variant Call Format (VCF), variants are annotated, ranked by putative pathogenicity, and  
25 presented for formal classification using a decision-support interface based on published  
26 guidelines from the American College of Medical Genetics and Genomics (ACMG). The system  
27 can accept files containing millions of variants and handle single-nucleotide variants (SNVs),  
28 simple insertions/deletions (indels), multiple-nucleotide variants (MNVs), and complex  
29 substitutions. PeCanPIE has been applied to classify variant pathogenicity in cancer  
30 predisposition genes in two large-scale investigations involving >4,000 pediatric cancer patients,  
31 and serves as a repository for the expert-reviewed results. While PeCanPIE’s web-based  
32 interface was designed to be accessible to non-bioinformaticians, its back end pipelines may  
33 also be run independently on the cloud, facilitating direct integration and broader adoption.  
34 PeCanPIE is publicly available and free for research use.

35

## 36 **Introduction**

37 Next-generation sequencing (NGS) has quickly become a mainstay for genetic variation studies  
38 in many research and clinical genomics laboratories. However, the sheer abundance of data  
39 produced for a single individual means that complex and often tedious data processing and  
40 curation are required to identify potentially disease-causing mutations. The process is  
41 simultaneously burdened by the volume of novel variants, many of which have scarce  
42 information available, and the diverse, distributed nature of existing variant information  
43 resources. Variant annotation tools have been developed to assist with several aspects of this  
44 work, which can add coding and noncoding prediction annotations and population-specific allele  
45 frequencies, as well as provide filtering options for variant prioritization (Wang et al. 2010;  
46 Cingolani et al. 2012; Ng et al. 2009; McLaren et al. 2016). Likewise, variant curation tools  
47 supporting classification for clinical pathogenicity following the ACMG guidelines (Richards et al.  
48 2015) have also been developed (Patel et al. 2017). While each resource offers valuable  
49 information to help researchers classify variant pathogenicity, integrated platforms are needed  
50 to provide support for all steps of the process, and streamline analysis of the thousands to  
51 millions of variants generated by NGS-based platforms. With these goals in mind, we  
52 developed “PeCanPIE” – the Pediatric Cancer Variant Pathogenicity Information Exchange – a  
53 cloud-based portal that provides an end-to-end workflow, beginning with a set of variants in VCF  
54 (Danecek et al. 2011) and ending with formal ACMG classification. PeCanPIE offers three key  
55 functions: 1) automated annotation, classification, and triage via our MedalCeremony pipeline  
56 (Zhang et al. 2015); 2) an interactive variant page and visualization tools to support expert  
57 curation and committee review; and 3) a reference database of expert-reviewed germline  
58 cancer-predisposing mutations.

59

## 60 Results

### 61 Process overview

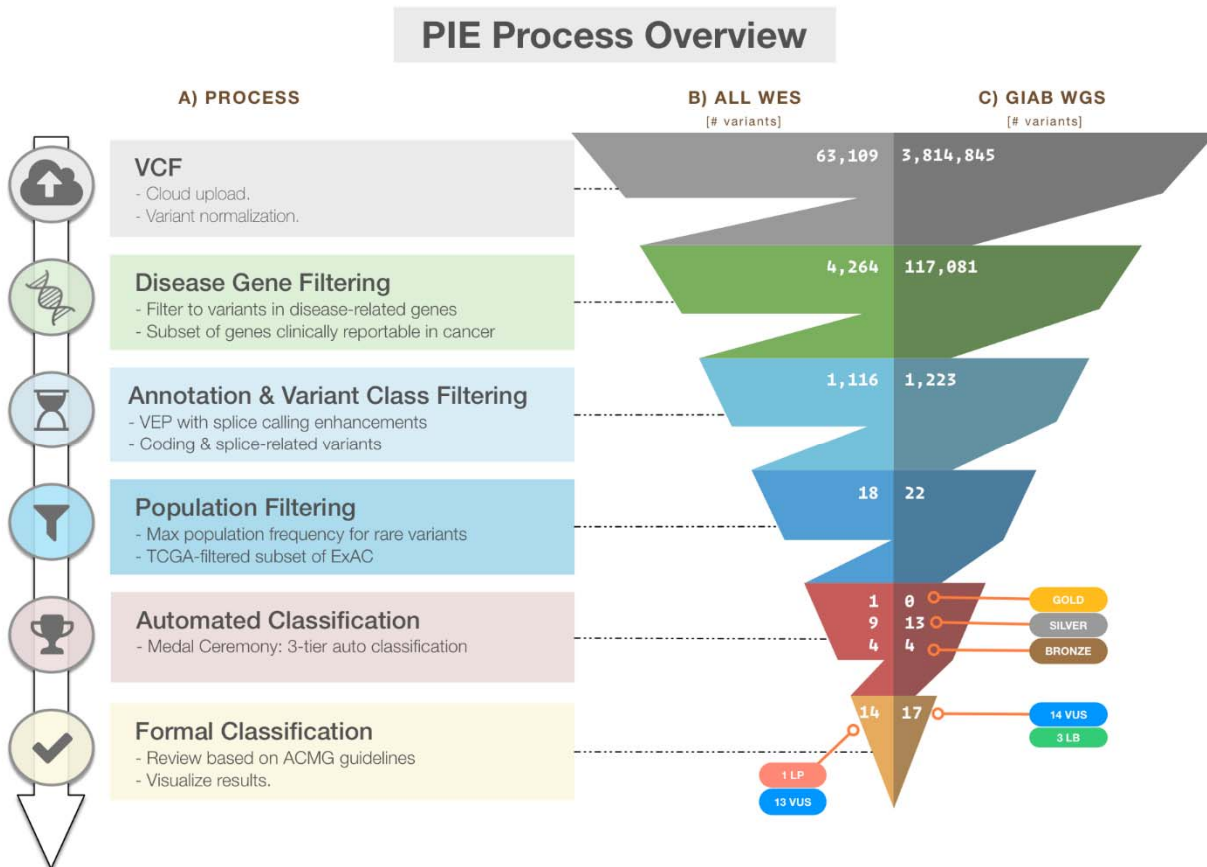

62

63 **Figure 1. Overview of variant classification using PeCanPIE.** (A) Overview of processing  
 64 steps from VCF through ACMG-based classification. Variant counts at each processing step for  
 65 (B) whole-exome sequencing data generated from a germline sample of a patient with acute  
 66 lymphoblastic leukemia (ALL), SJNORM015857\_G1 (Methods) and (C) whole-genome  
 67 sequencing data generated from Genome in a Bottle normal sample NA12878\_HG001  
 68 (Methods).

69 As outlined in Fig. 1A, PeCanPIE launches with an interface for uploading a VCF file, which is  
 70 then filtered to a set of disease-related genes (Methods, Table S1); users may alternatively

71 specify their own list of genes of interest. Variants are next assigned gene and protein  
72 annotations and filtered by functional class and population frequency derived from the Exome  
73 Aggregation Consortium (ExAC) database (Lek et al. 2016). To ensure that pathogenic  
74 germline variants in cancer patients are retained, PeCanPIE uses the distribution of ExAC that  
75 excludes patient samples from The Cancer Genome Atlas (TCGA) (McLendon et al. 2008). The  
76 remaining variants are stratified into three tiers (gold, silver, and bronze) as an indication of  
77 potential pathogenicity computed by our MedalCeremony pipeline. Finally, each “medaled”  
78 variant is linked to a standalone page featuring an interface to support semi-automated  
79 pathogenicity classification using ACMG guidelines. Two examples in Fig. 1 demonstrate the  
80 classification process using VCF files generated from whole-exome sequencing (WES) of an  
81 acute lymphoblastic leukemia (ALL) patient (Moriyama et al. 2015) (Fig. 1B) and whole-genome  
82 sequencing (WGS) from the Genome in a Bottle (GiaB) project (Zook et al. 2014) (Fig. 1C),  
83 respectively. Only 14 of the 63,109 variants from the WES data and 17 of the approximately 4  
84 million variants from the WGS data required expert review, which resulted in 1 and 0  
85 pathogenic/likely pathogenic (P/LP) variants, respectively.

## 86 **Automated classification by the MedalCeremony pipeline**

87 Automated classification of variant pathogenicity implemented in the MedalCeremony pipeline  
88 classifies variants having a population frequency no higher than 0.001 (or a user-defined cutoff)  
89 in the ExAC database. Additional annotations are incorporated to aid with the classification  
90 process: 1) COSMIC (Forbes et al. 2008) hits; 2) functional annotations from dbNSFP (Liu et al.  
91 2013) (protein domain and damage prediction algorithm calls); and 3) allele frequencies in the  
92 NHLBI GO Exome Sequencing Project (ESP), the Thousand Genomes Project (Auton et al.  
93 2015), ExAC, and the Pediatric Cancer Genome Project (PCGP) (Downing et al. 2012).

94 An overview of the gold, silver, and bronze classification scheme implemented in  
95 MedalCeremony is shown in Fig. 2. Gold medals are assigned to truncating variants (including

96 splice variants) in tumor suppressor genes (Zhao et al. 2016; Chakravarty et al. 2017), matches  
97 to highly-curated databases (IARC TP53 (Bouaoun et al. 2016), ClinVar expert-panel-reviewed  
98 pathogenic (P) or likely pathogenic (LP) variants, ASU TERT (Podlevsky et al. 2007), ARUP  
99 RET (Margraf et al. 2009), NHGRI Breast Cancer Information Core (Szabo et al. 2000), somatic  
100 mutation hotspots in COSMIC (observed in  $\geq 10$  tumors after removal of hypermutators) and  
101 PCGP, and St. Jude committee-reviewed germline P/LP variants. Silver medals are assigned to  
102 in-frame indels, truncation events in non-tumor-suppressor genes, variants predicted damaging  
103 by *in silico* algorithms, and matches to additional databases (ClinVar non-expert-panel P/LP,  
104 BRCA Share (Béroud et al. 2016), LOVD (Fokkema et al. 2011) locus-specific databases for  
105 APC and MSH2, and RB1 (Lohmann and Gallie 1993)). Unless otherwise medaled, variants  
106 predicted to be tolerated by *in silico* algorithms are assigned a bronze medal. Imperfect  
107 database matches (e.g., a different allele at the same genomic position or at the same codon  
108 but with a different amino acid change) are typically assigned a lower grade medal, e.g. silver  
109 rather than gold. Variants not meeting any of the previous criteria, e.g. most silent variants and  
110 those without any functional annotations, will not receive a medal. Amino acid and pathogenicity  
111 codes from the diverse variant databases used in this process are standardized to improve the  
112 reliability of annotations and utility of information (Methods). A summary of resources is shown  
113 in Table 1. MedalCeremony may also be run as a stand-alone pipeline on the St. Jude Cloud  
114 platform (Methods).

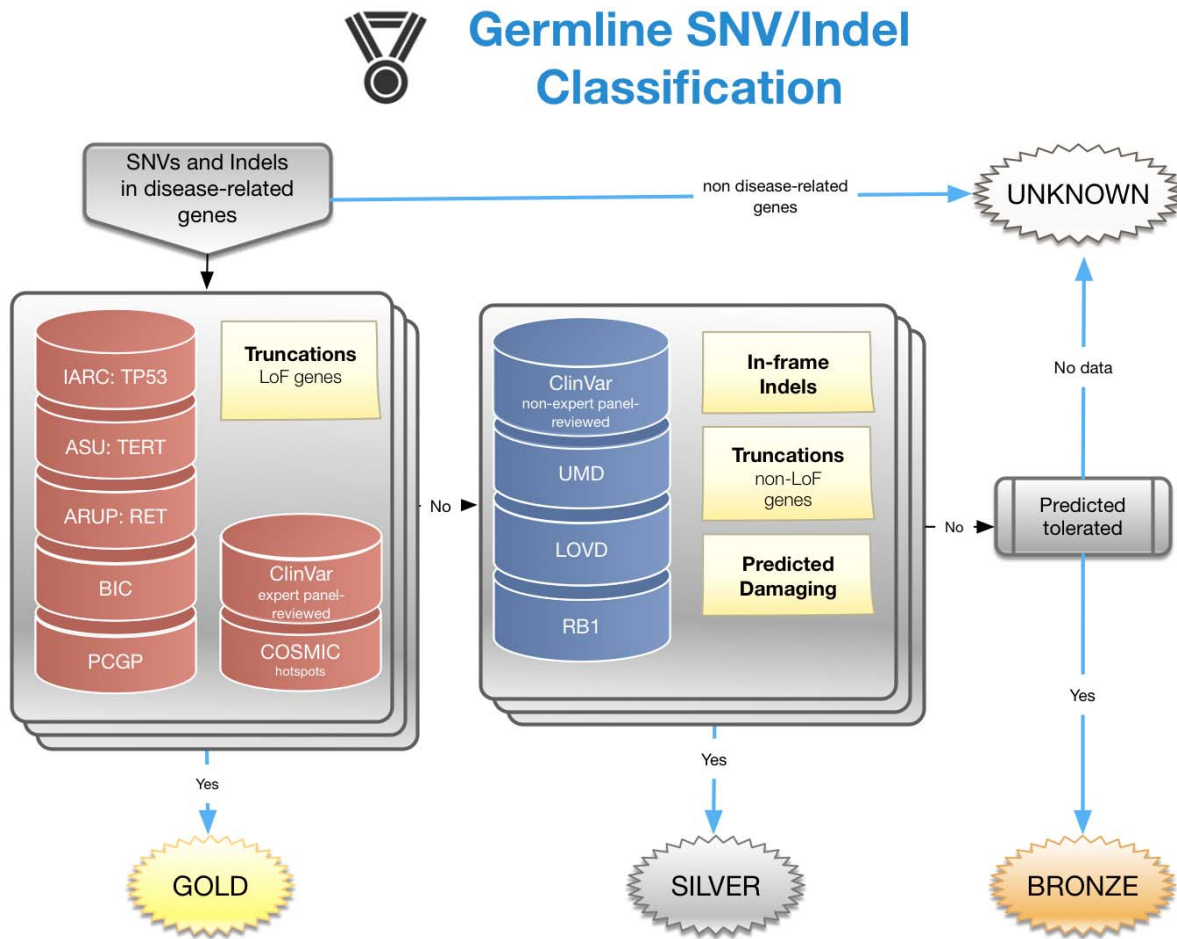

115

116

**Figure 2. Design of the MedalCeremony pipeline for automated germline variant**

117

**classification.** Truncating variants in loss-of-function genes (e.g. tumor suppressors) and those

118

matching highly-curated databases receive gold medals. Truncations in non-loss-of-function

119

genes, in-frame indels, predicted damaging variants, and matches to additional databases

120

receive silver medals. Otherwise variants predicted to be tolerated by damage-prediction

121

algorithms receive bronze. Imperfect database matches receive a lower-grade medal than exact

122

matches. Variants not meeting any of the prior criteria receive a result of “unknown”.

123

**Table 1. Databases used in classification**

| Source | URL |
|--------|-----|
|--------|-----|

|                               |                                                                                                                               |
|-------------------------------|-------------------------------------------------------------------------------------------------------------------------------|
| <b>ClinVar</b>                | <a href="http://www.ncbi.nlm.nih.gov/clinvar/">http://www.ncbi.nlm.nih.gov/clinvar/</a>                                       |
| <b>dbNSFP</b>                 | <a href="https://sites.google.com/site/jpopgen/dbNSFP">https://sites.google.com/site/jpopgen/dbNSFP</a>                       |
| <b>ExAC</b>                   | <a href="http://exac.broadinstitute.org/">http://exac.broadinstitute.org/</a>                                                 |
| <b>COSMIC</b>                 | <a href="https://cancer.sanger.ac.uk/cosmic/">https://cancer.sanger.ac.uk/cosmic/</a>                                         |
| <b>IARC TP53</b>              | <a href="http://tp53.iarc.fr/">http://tp53.iarc.fr/</a>                                                                       |
| <b>St. Jude PCGP</b>          | <a href="https://pecan.stjude.cloud/pcgp-explore">https://pecan.stjude.cloud/pcgp-explore</a>                                 |
| <b>NHGRI BIC</b>              | <a href="http://research.nhgri.nih.gov/bic/">http://research.nhgri.nih.gov/bic/</a>                                           |
| <b>RB1</b>                    | <a href="http://rb1-lovd.d-lohmann.de/">http://rb1-lovd.d-lohmann.de/</a>                                                     |
| <b>BRCA Share</b>             | <a href="http://www.umd.be/BRCA1/">http://www.umd.be/BRCA1/</a>                                                               |
| <b>ASU TERT</b>               | <a href="http://telomerase.asu.edu/diseases.html#tert">http://telomerase.asu.edu/diseases.html#tert</a>                       |
| <b>University of Utah RET</b> | <a href="http://www.arup.utah.edu/database/MEN2/MEN2_display.php">http://www.arup.utah.edu/database/MEN2/MEN2_display.php</a> |
| <b>LOVD APC, MSH2</b>         | <a href="http://chromium.liacs.nl/LOVD2/colon_cancer/">http://chromium.liacs.nl/LOVD2/colon_cancer/</a>                       |

124

## 125 **Variant review interface**

126 After MedalCeremony classification, the results are presented in a table that can be searched or  
127 filtered by gene, variant class, medal status, or classification by expert review (Fig. 3A). If a  
128 variant has been previously classified by the user or the St. Jude germline variant review  
129 committee, that information will be pre-populated. Each row links to a variant page containing  
130 extensive annotations, including gene information from NCBI and OMIM (Amberger et al. 2015),  
131 ClinVar match details, population frequency, and *in silico* predictions of deleteriousness (Fig.  
132 3B). The page also includes an embedded ProteinPaint view (Zhou et al. 2015), which overlays  
133 the current variant with aggregated somatic mutations and expert-classified P/LP germline  
134 variants on the protein product. This enables visual inspection of variant recurrence, hotspots,  
135 and enrichment of loss-of-function mutations.



A) RESULTS PAGE - GIAB WGS

Class:  Committee Classification:  Somatic Medal:  Germline Medal:  << < 1 / 123 > >>

Gene Categories:  Cancer (512)  Immunological (221)  ALS (13)  Mendelian (18)  Non-malignant Hematological (80)  Cardiovascular (121)

Search:  **1222 variants**

| GeneName                                         | Chr / Pos   | Allele Change | AA Change           | Medal   |          | Link                 |
|--------------------------------------------------|-------------|---------------|---------------------|---------|----------|----------------------|
|                                                  |             |               |                     | Somatic | Germline |                      |
| NOP10 <small>non-malignant hematological</small> | 15:34634318 | G→A           | K19_E2splice_region |         |          | <a href="#">Page</a> |
| AKAP9 <small>cancer</small>                      | 7:91694743  | A→G           | E2059G              |         |          | <a href="#">Page</a> |
| ALK <small>cancer</small>                        | 2:29455199  | A→T           | L868Q               |         |          | <a href="#">Page</a> |
| RAD50 <small>cancer</small>                      | 5:131925483 | G→C           | G469A               |         |          | <a href="#">Page</a> |
| SLX4 <small>cancer</small>                       | 16:3639230  | G→A           | P1470L              |         |          | <a href="#">Page</a> |
| NOTCH1 <small>cancer</small>                     | 9:139400299 | C→A           | R1350L              |         |          | <a href="#">Page</a> |

B) PREDICTION WHEEL FOR NOTCH1 R1350L

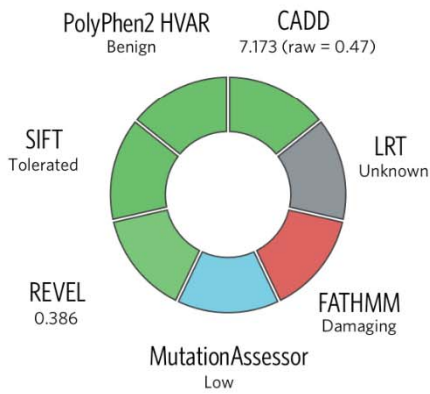

C) POPULATION FREQUENCY DATA FOR NOTCH1 R1350L

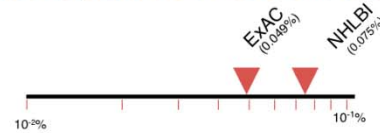

| Population               | Allele Frequency | Allele Count | Allele Number |
|--------------------------|------------------|--------------|---------------|
| Adjusted                 | 0.06216 %        | 49           | 78830         |
| African/African American | 0 %              | 0            | 5344          |
| East Asian               | 0 %              | 0            | 6230          |
| Finnish                  | 0.08772 %        | 3            | 3420          |
| Latino                   | 0 %              | 0            | 8266          |
| Non-Finnish European     | 0.09522 %        | 40           | 42010         |
| Other                    | 0 %              | 0            | 482           |
| South Asian              | 0.04588 %        | 6            | 13078         |
| <b>TOTALS</b>            | <b>0.04904 %</b> | <b>51</b>    | <b>103988</b> |

137 **Figure 3. Annotation interface.** Excerpts of PeCanPIE annotation interface. (A) Results for  
 138 Genome in a Bottle WGS dataset. Variant page details for *NOTCH1* R1350L: (B) functional  
 139 predictions, and (C) variant population frequency detail from ExAC ex-TCGA database.

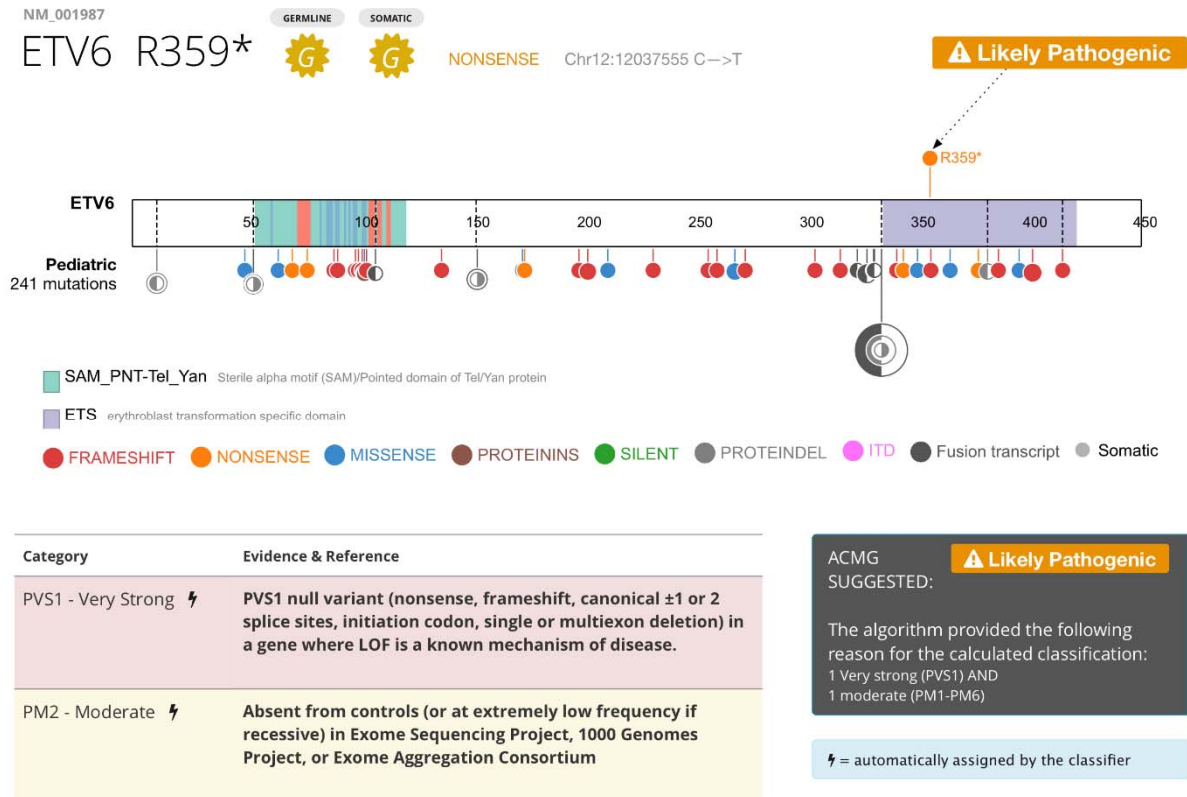

140

141 **Figure 4. ACMG classification on ETV6.** Top, ProteinPaint display of somatic *ETV6* variants  
142 across 11 subtypes of pediatric leukemia, showing enrichment of loss-of-function mutations  
143 (frameshifts in red, nonsense variants in orange). Arrow indicates position of germline R359\*  
144 variant. Bottom, detail of PeCanPIE ACMG classification interface for R359\* variant.

#### 145 **ACMG classification interface**

146 A powerful feature of the variant detail page is an interactive graphical interface that allows a  
147 reviewer to enter a series of pathogenicity criteria evidence tags (e.g., population frequency,  
148 segregation, functional significance, and *in silico* prediction), along with supporting information  
149 such as PubMed IDs, to automatically calculate a 5-tier classification: Pathogenic (P), Likely  
150 Pathogenic (LP), Unknown Significance (VUS), Likely Benign (LB), and Benign (B) based on the  
151 ACMG algorithm. MedalCeremony can automatically generate ACMG classification tags for  
152 variants, which are prepopulated into PeCanPIE's classification interface. The following  
153 automatic tags are implemented: PVS1 (truncating variant in a tumor suppressor or other loss-  
154 of-function gene), PM1 (somatic hotspot in COSMIC), PM2 (absent from ExAC or appearing at  
155 a frequency of no greater than 0.0001) and the companion BA1 tag (>5% population frequency  
156 in ExAC), PM4 (in-frame protein insertions and deletions), PS1 and PM5 (amino acid  
157 comparisons made vs. pathogenic variants in ClinVar or those identified by the St. Jude  
158 Germline Review Committee). Automatically-assigned tags may be removed by the analyst if  
159 desired. This automation provides improved support versus manual curation interfaces, while  
160 still retaining analyst control over the ultimate classification decisions. As shown on the variant  
161 page for *ETV6* Arg359Ter, the single gold-medal variant detected in the patient with ALL was  
162 expert-classified as likely pathogenic because the mutation is present in a disease-related gene  
163 (i.e., *ETV6* is a pediatric ALL driver gene), is a loss-of-function null variant, and is not present in  
164 the ExAC database (Fig. 4).

165 Comparison of a germline variant with aggregated somatic variants can help inform germline  
166 classification for cancer predisposition genes. For example, family studies have identified a  
167 *PAX5* G183S germline mutation conferring susceptibility to B-ALL, which corresponds to  
168 somatic mutations detected in pediatric B-ALL and lymphoma (Shah et al. 2013). A similar  
169 profile was observed in the example WES data from an ALL patient presented in Fig. 1B:  
170 MedalCeremony assigned a single gold medal—a novel *ETV6* nonsense variant within the ETS  
171 domain (NM\_001987.4:c.1075C>T, NP\_001978.1:p.Arg359Ter)—based on the criteria of  
172 truncation in a tumor suppressor gene. The ProteinPaint view embedded in the variant page  
173 confirmed that in *ETV6*, somatic mutations are dominated by loss-of-function mutations across  
174 pediatric leukemia (Fig. 4), consistent with the tumor-suppressor gene model. Reviewers may  
175 enter custom evidence such as this into the interface for use during final classification.

## 176 **Pathogenicity classification of cancer predisposition genes in 4,000 pediatric** 177 **cancer patients**

178 PeCanPIE was designed in support of large-scale germline variation analysis projects, and was  
179 iteratively improved based on the feedback of an interdisciplinary group of researchers.  
180 Germline variants from the following studies have been analyzed thus far: 1) a study of germline  
181 variations in predisposition genes in 1,120 children with cancer (Zhang et al. 2015) classified  
182 890 variants, identifying 109 as pathogenic (P) and 25 as likely-pathogenic (LP); 2) the St. Jude  
183 LIFE project, a follow-up study of 3,006 long-term survivors of pediatric cancer (Wang et al.  
184 2018), classified 3,417 variants, including 188 P and 160 LP; and 3) Genomes for Kids  
185 (manuscript in preparation), a clinical research study of 310 pediatric cancer patients  
186 (<https://clinicaltrials.gov/ct2/show/NCT02530658>), clinically reported 25 P and 6 LP variants.  
187 PeCanPIE also serves as a repository for expert-curated decisions for the first two studies,  
188 whose resulting annotations are reapplied to incoming variant classification requests.

189

## 190 **Discussion**

191 Although PeCanPIE's features partially overlap those of other available tools (Li and Wang  
192 2017; Masica et al. 2017), it provides several new capabilities. Specifically, variant classification  
193 is tightly integrated with the rich resource of somatic mutation data in pediatric cancer, which  
194 can be explored online via the embedded ProteinPaint view. Users can also analyze indels,  
195 MNVs, and complex substitutions, whereas web-based implementations of similar tools may be  
196 limited to SNVs alone (Li and Wang 2017). Another key feature is the cloud-based  
197 implementation of PeCanPIE, which obviates the need for complex software installation and  
198 command-line workflows. This design also allows back end analysis pipelines to be invoked  
199 independently from PeCanPIE, for users who prefer direct or programmatic access over a  
200 graphical interface. In comparison with web-based systems (Masica et al. 2017) which provide  
201 batch annotation of variants based on machine-learning scores (Carter et al. 2013, 2009),  
202 PeCanPIE provides more granular annotations and individual ACMG-recommended evidence  
203 tags to facilitate interpretation of pathogenicity classifications. Via dbNSFP, PeCanPIE also  
204 provides access to REVEL (Ioannidis et al. 2016) pathogenicity scores, which fared well in a  
205 recent comparison of algorithms for use with ACMG clinical variant interpretation guidelines  
206 (Ghosh et al. 2017). Lastly, PeCanPIE's workflow offers advantages over CIVIC's crowdsourced  
207 clinical interpretation of variants (Ta 2017), which relies on completely manual classification and  
208 data entry, i.e., VCF upload, annotation, and prioritization are not provided.

209 A limitation of the existing method is that damage-prediction algorithm scores are taken from the  
210 dbNSFP database, which only contains data for non-silent SNVs. While these annotations are  
211 unavailable for indels, because protein class annotations are taken into account by the scoring  
212 algorithm, high-impact events such as truncating variations will still be highly ranked. For variant  
213 population frequency filtering, we are currently using the TCGA-subtracted release of ExAC

214 instead of gnomAD (Lek et al. 2016) because the gnomAD database contains TCGA samples;  
215 we plan to migrate to gnomAD once a TCGA-subtracted version becomes publicly available.

216 In conclusion, the PeCanPIE platform significantly accelerates the variant classification process  
217 by automating many prerequisite steps, helping to prioritize potentially pathogenic variants in  
218 NGS data, and providing a robust platform for investigating variant pathogenicity in disease-  
219 related genes. While PeCanPIE was developed and tested with pediatric cancer susceptibility  
220 as a primary focus, we are in the process of expanding its scope to other pediatric and adult  
221 diseases. Users are now able to specify custom gene lists to analyze appropriate to their  
222 diseases of interest, enabling disease-specific variant curation and facilitating gene discovery.

223

224

## 225 **Methods**

### 226 **Disease-related gene list**

227 The disease-related gene list comprises both cancer-related and non-cancer genes (Table S1).  
228 The cancer gene list was compiled from public resources and cancer genetic studies including:  
229 1) studies of germline mutations in predisposition genes in cancer patients (Zhang et al. 2015;  
230 Huang et al. 2018; Wang et al. 2018); 2) cancer predisposition genes compiled by Rahman  
231 (Rahman 2014); 3) the Cancer Gene Census (Futreal et al. 2004); and 4) driver genes identified  
232 in pediatric and adult pan-cancer studies (Ma et al. 2018; Gröbner et al. 2018). Publications  
233 were reviewed to confirm the presence of either loss-of-function or gain-of-function mutations in  
234 cancer driver genes, excluding those previously identified as having elevated mutation rates  
235 (e.g. *LRP1B* (Lawrence et al. 2013)) and those reported only as fusion partners. Other disease-  
236 related genes include non-malignant hematological, immunodeficiency, and amyotrophic lateral  
237 sclerosis (ALS)-related genes (Taylor et al. 2016), and genes from ACMG and Ambry Genetics  
238 incidental finding gene lists (Kalia et al. 2017). Filtering the variants to disease-related genes  
239 helps focus on areas with relevant research interest and reduce the downstream processing  
240 burden, which is especially helpful for WGS data which may contain 4-5 million variants per  
241 sample. A user may choose to focus on one or more of these pre-defined disease categories  
242 for expert review or provide their own gene lists for custom analysis.

### 243 **Gene annotation and splice calling enhancement**

244 Gene annotations are performed using the Ensembl Variant Effect Predictor (VEP) pipeline  
245 (McLaren et al. 2016), which provides information on a variant basis for the affected gene and  
246 transcript, functional class (e.g., silent, missense, and nonsense), and effect on protein coding.  
247 We enhanced splice variant annotation by reclassifying silent or missense variants at exon  
248 boundaries, which may impact splicing (e.g., *TP53* NM\_000546.5:c.375G>A,

249 NP\_000537.3:p.Thr125Thr (Soudon et al. 1991)). While certainly not all of these variants will  
250 ultimately prove to be splice-related, these adjustments ensure additional scrutiny during expert  
251 review. A subsequent filtering step retains only variants in coding and splice-related regions.  
252 Silent variants are also kept because, in rare cases, they may cause aberrant splicing and thus  
253 be pathogenic. For example, ClinVar (Landrum et al. 2018) ID 90407 is a “silent” variant in the  
254 colon cancer predisposition gene *MLH1* (NM\_000249.3:c.882C>T, NP\_000240.1:p.Leu294=)  
255 that has been determined by an expert panel to be a pathogenic splice variant (Auclair et al.  
256 2006). We refer to this enhanced pipeline as VEP+, which may also be run separately on the  
257 St. Jude Cloud platform.

## 258 **St. Jude Cloud platform**

259 While PeCanPIE was designed as a web portal to maximize ease of use for non-  
260 bioinformaticians, two component pipelines are also publicly accessible. On its back end, St.  
261 Jude Cloud (<https://stjude.cloud>) uses DNAnexus (<https://www.dnanexus.com/>), a platform  
262 where user-created software pipelines can be installed and run on cloud computing instances.  
263 A DNAnexus account is required to use PeCanPIE for secure storage and to send notifications  
264 when submitted jobs are complete. Once a pipeline has been installed on DNAnexus, it is  
265 straightforward for non-expert users to run it, either from a standardized web interface or a  
266 command-line client. We have created two DNAnexus pipelines that are used by PeCanPIE,  
267 VEP+ for variant annotation (app-stjude\_vep\_plus) and MedalCeremony for automated  
268 classification (app-stjude\_medal\_ceremony). The availability of these component pipelines on  
269 the cloud provides users and institutions straightforward, scalable access to the software, and  
270 our centralized maintenance allows all users to immediately benefit from updates and new  
271 features as they become available. PeCanPIE is free for non-commercial use.

## 272 **Nomenclature standardization**



273 We have observed that various variant databases which form the foundation of  
274 annotations for PeCanPIE vary in the structure and quality of variant specification. For  
275 example, databases may provide only protein-level annotations, only genomic  
276 annotations, or both. Likewise, there are many variations on the HGVS-like protein  
277 annotation nomenclature in circulation. The PeCanPIE code attempts to be flexible in  
278 parsing, standardizing, and formatting where possible, e.g. protein annotations may use  
279 either 3-character or 1-character protein codes (e.g. “Ser” or “S”), and a number of  
280 variations on stop codon formatting have been observed (“Ter”, “Term”, “\*”, “X”, and  
281 “Stop”). In some cases partial information such as codon numbers were extracted from  
282 an otherwise incomplete annotation. Some databases also provide variations on the 5-  
283 tier ACMG pathogenicity calls which PeCanPIE attempts to standardize into  
284 B/LB/VUS/LP/P for easier comparison. We believe these standardizations further  
285 improve the reliability of annotations and utility of information provided by the PeCanPIE  
286 platform.

### 287 **Example data**

288 The ALL variants in Figure 1b were called from St. Jude sample SJNORM015857\_G1. Variant  
289 calling was performed with Bambino using the “high 20” profile which consists of the following  
290 command-line parameters: “-min-quality 20 -min-flanking-quality 20 -min-alt-allele-count 3 -min-  
291 minor-frequency 0 -broad-min-quality 10 -mmf-max-hq-mismatches 4 -mmf-max-hq-  
292 mismatches-xt-u 10 -mmf-min-quality 15 -mmf-max-any-mismatches 6 -unique-filter-coverage 2  
293 -no-strand-skew-filter”. The results were subsequently filtered to variants having a variant allele  
294 frequency of at least 20%, an average mapping quality of 20 for variant reads, at least 5 reads  
295 of coverage for the variant allele, bi-directional confirmation of the variant allele, and at least 20  
296 reads of total coverage. The results were converted to VCF by an in-house script and uploaded

297 to PeCanPIE. The Genome-in-a-Bottle VCF used for Figure 1c is available from [ftp://ftp-trace.ncbi.nlm.nih.gov/giab/ftp/release/NA12878\\_HG001/NISTv3.3.2/GRCh37/HG001\\_GRCh37\\_GIAB\\_highconf\\_CG-IIIIFB-IIIIGATKHC-Ion-10X-SOLID\\_CHROM1-X\\_v.3.3.2\\_highconf\\_PGandRTGphasetransfer.vcf.gz](ftp://ftp-trace.ncbi.nlm.nih.gov/giab/ftp/release/NA12878_HG001/NISTv3.3.2/GRCh37/HG001_GRCh37_GIAB_highconf_CG-IIIIFB-IIIIGATKHC-Ion-10X-SOLID_CHROM1-X_v.3.3.2_highconf_PGandRTGphasetransfer.vcf.gz). This bgzip-compressed VCF file may be  
301 used directly with PeCanPIE.

## 302 **Software Availability**

303 PeCanPIE is available at [https://platform.stjude.cloud/tools/pecan\\_pie](https://platform.stjude.cloud/tools/pecan_pie) and is one component of  
304 the St. Jude Cloud platform (<https://stjude.cloud/>).

305

## 306 **Acknowledgements**

307 This project was supported by the American Lebanese Syrian Associated Charities (ALSAC) of  
308 St. Jude Children's Research Hospital, by a Cancer Center Support (Core) grant (CA21765) and  
309 a grant to JZ (CA21635) from the National Cancer Institute. We thank Yiyang Wu for  
310 discussions of *in silico* algorithms.

311 *Author contributions:* Analysis pipeline design and development (M.N.E.), web software design  
312 and development (A.N.P., X.Z., J.B.B.), cloud pipeline development (M.N.E., C.L.M.), tool  
313 development (M.N.E., S.V.R., M.C.R.), genomic data analysis (E.R., D.J.H., Y.L., C.A.K., J.Z.,  
314 S.N., Z.W., L.L.R., A.N.P., M.N.E.), manuscript text (M.N.E., J.Z., E.R., C.A.K.), figure  
315 preparation (A.N.P., M.N.E., J.Z.), database support (M.R.W.), project direction and supervision  
316 (J.Z., J.R.D., K.E.N.)

317

## 318 **References**

- 319 Amberger JS, Bocchini CA, Schiettecatte F, Scott AF, Hamosh A. 2015. OMIM.org: Online  
320 Mendelian Inheritance in Man (OMIM®), an online catalog of human genes and genetic  
321 disorders. *Nucleic Acids Res* **43**: D789–D798.  
322 <http://www.ncbi.nlm.nih.gov/pubmed/25428349> (Accessed May 25, 2018).
- 323 Auclair J, Busine MP, Navarro C, Ruano E, Montmain G, Desseigne F, Saurin JC, Lasset C,  
324 Bonadona V, Giraud S, et al. 2006. Systematic mRNA analysis for the effect of MLH1  
325 and MSH2 missense and silent mutations on aberrant splicing. *Hum Mutat* **27**: 145–154.  
326 <http://www.ncbi.nlm.nih.gov/pubmed/16395668> (Accessed April 3, 2018).
- 327 Auton A, Abecasis GR, Altshuler DM, Durbin RM, Abecasis GR, Bentley DR, Chakravarti A,  
328 Clark AG, Donnelly P, Eichler EE, et al. 2015. A global reference for human genetic  
329 variation. *Nature* **526**: 68–74. <http://www.ncbi.nlm.nih.gov/pubmed/26432245> (Accessed  
330 April 16, 2018).
- 331 Bérout C, Letovsky SI, Braastad CD, Caputo SM, Beaudoux O, Bignon YJ, Bressac-De  
332 Paillerets B, Bronner M, Buell CM, Collod-Bérout G, et al. 2016. BRCA Share: A Collection  
333 of Clinical BRCA Gene Variants. *Hum Mutat* **37**: 1318–1328.  
334 <http://www.ncbi.nlm.nih.gov/pubmed/27633797> (Accessed May 23, 2018).
- 335 Bouaoun L, Sonkin D, Ardin M, Hollstein M, Byrnes G, Zavadil J, Olivier M. 2016. TP53  
336 Variations in Human Cancers: New Lessons from the IARC TP53 Database and Genomics  
337 Data. *Hum Mutat* **37**: 865–876. <http://www.ncbi.nlm.nih.gov/pubmed/27328919> (Accessed  
338 April 3, 2018).
- 339 Carter H, Chen S, Isik L, Tyekucheva S, Velculescu VE, Kinzler KW, Vogelstein B, Karchin R.  
340 2009. Cancer-Specific High-Throughput Annotation of Somatic Mutations: Computational

- 341 Prediction of Driver Missense Mutations. *Cancer Res* **69**: 6660–6667.  
342 <http://www.ncbi.nlm.nih.gov/pubmed/19654296> (Accessed April 2, 2018).
- 343 Carter H, Douville C, Stenson PD, Cooper DN, Karchin R. 2013. Identifying Mendelian disease  
344 genes with the Variant Effect Scoring Tool. *BMC Genomics* **14**: S3.  
345 <http://www.ncbi.nlm.nih.gov/pubmed/23819870> (Accessed April 2, 2018).
- 346 Chakravarty D, Gao J, Phillips SM, Kundra R, Zhang H, Wang J, Rudolph JE, Yaeger R,  
347 Soumerai T, Nissan MH, et al. 2017. OncoKB: A Precision Oncology Knowledge Base.  
348 *JCO Precis Oncol* **2017**. <http://www.ncbi.nlm.nih.gov/pubmed/28890946> (Accessed May  
349 23, 2018).
- 350 Cingolani P, Platts A, Wang LL, Coon M, Nguyen T, Wang L, Land SJ, Lu X, Ruden DM. 2012.  
351 A program for annotating and predicting the effects of single nucleotide polymorphisms,  
352 SnpEff. *Fly (Austin)* **6**: 80–92. <http://www.ncbi.nlm.nih.gov/pubmed/22728672> (Accessed  
353 March 30, 2018).
- 354 Danecek P, Auton A, Abecasis G, Albers CA, Banks E, DePristo MA, Handsaker RE, Lunter G,  
355 Marth GT, Sherry ST, et al. 2011. The variant call format and VCFtools. *Bioinformatics* **27**:  
356 2156–2158. <http://www.ncbi.nlm.nih.gov/pubmed/21653522> (Accessed May 17, 2018).
- 357 Downing JR, Wilson RK, Zhang J, Mardis ER, Pui C-H, Ding L, Ley TJ, Evans WE. 2012. The  
358 Pediatric Cancer Genome Project. *Nat Genet* **44**: 619–622.  
359 <http://www.ncbi.nlm.nih.gov/pubmed/22641210> (Accessed March 30, 2018).
- 360 Fokkema IFAC, Taschner PEM, Schaafsma GCP, Celli J, Laros JFJ, den Dunnen JT. 2011.  
361 LOVD v.2.0: the next generation in gene variant databases. *Hum Mutat* **32**: 557–563.  
362 <http://www.ncbi.nlm.nih.gov/pubmed/21520333> (Accessed May 23, 2018).
- 363 Forbes SA, Bhamra G, Bamford S, Dawson E, Kok C, Clements J, Menzies A, Teague JW,

- 364 Futreal PA, Stratton MR. 2008. The Catalogue of Somatic Mutations in Cancer (COSMIC).  
365 In *Current Protocols in Human Genetics*, Vol. Chapter 10 of, p. Unit 10.11, John Wiley &  
366 Sons, Inc., Hoboken, NJ, USA <http://www.ncbi.nlm.nih.gov/pubmed/18428421> (Accessed  
367 April 11, 2018).
- 368 Futreal PA, Coin L, Marshall M, Down T, Hubbard T, Wooster R, Rahman N, Stratton MR. 2004.  
369 A census of human cancer genes. *Nat Rev Cancer* **4**: 177–183.  
370 <http://www.nature.com/articles/nrc1299> (Accessed April 19, 2018).
- 371 Ghosh R, Oak N, Plon SE. 2017. Evaluation of in silico algorithms for use with ACMG/AMP  
372 clinical variant interpretation guidelines. *Genome Biol* **18**: 225.  
373 <http://www.ncbi.nlm.nih.gov/pubmed/29179779> (Accessed March 27, 2018).
- 374 Gröbner SN, Worst BC, Weischenfeldt J, Buchhalter I, Kleinheinz K, Rudneva VA, Johann PD,  
375 Balasubramanian GP, Segura-Wang M, Brabetz S, et al. 2018. The landscape of genomic  
376 alterations across childhood cancers. *Nature* **555**: 321–327.  
377 <http://www.ncbi.nlm.nih.gov/pubmed/29489754> (Accessed April 23, 2018).
- 378 Huang K, Mashl RJ, Wu Y, Ritter DI, Wang J, Oh C, Paczkowska M, Reynolds S, Wyczalkowski  
379 MA, Oak N, et al. 2018. Pathogenic Germline Variants in 10,389 Adult Cancers. *Cell* **173**:  
380 355–370.e14. <http://linkinghub.elsevier.com/retrieve/pii/S0092867418303635> (Accessed  
381 April 19, 2018).
- 382 Ioannidis NM, Rothstein JH, Pejaver V, Middha S, McDonnell SK, Baheti S, Musolf A, Li Q,  
383 Holzinger E, Karyadi D, et al. 2016. REVEL: An Ensemble Method for Predicting the  
384 Pathogenicity of Rare Missense Variants. *Am J Hum Genet* **99**: 877–885.  
385 <http://www.ncbi.nlm.nih.gov/pubmed/27666373> (Accessed April 2, 2018).
- 386 Kalia SS, Adelman K, Bale SJ, Chung WK, Eng C, Evans JP, Herman GE, Hufnagel SB, Klein  
387 TE, Korf BR, et al. 2017. Recommendations for reporting of secondary findings in clinical

- 388 exome and genome sequencing, 2016 update (ACMG SF v2.0): a policy statement of the  
389 American College of Medical Genetics and Genomics. *Genet Med* **19**: 249–255.  
390 <http://www.ncbi.nlm.nih.gov/pubmed/27854360> (Accessed May 7, 2018).
- 391 Landrum MJ, Lee JM, Benson M, Brown GR, Chao C, Chitipiralla S, Gu B, Hart J, Hoffman D,  
392 Jang W, et al. 2018. ClinVar: improving access to variant interpretations and supporting  
393 evidence. *Nucleic Acids Res* **46**: D1062–D1067.  
394 <http://www.ncbi.nlm.nih.gov/pubmed/29165669> (Accessed April 16, 2018).
- 395 Lawrence MS, Stojanov P, Polak P, Kryukov G V., Cibulskis K, Sivachenko A, Carter SL,  
396 Stewart C, Mermel CH, Roberts SA, et al. 2013. Mutational heterogeneity in cancer and the  
397 search for new cancer-associated genes. *Nature* **499**: 214–218.
- 398 Lek M, Karczewski KJ, Minikel E V., Samocha KE, Banks E, Fennell T, O'Donnell-Luria AH,  
399 Ware JS, Hill AJ, Cummings BB, et al. 2016. Analysis of protein-coding genetic variation in  
400 60,706 humans. *Nature* **536**: 285–291. <http://www.nature.com/articles/nature19057>  
401 (Accessed March 27, 2018).
- 402 Li Q, Wang K. 2017. InterVar: Clinical Interpretation of Genetic Variants by the 2015 ACMG-  
403 AMP Guidelines. *Am J Hum Genet* **100**: 267–280.  
404 <http://www.ncbi.nlm.nih.gov/pubmed/28132688> (Accessed April 2, 2018).
- 405 Liu X, Jian X, Boerwinkle E. 2013. dbNSFP v2.0: A Database of Human Non-synonymous  
406 SNVs and Their Functional Predictions and Annotations. *Hum Mutat* **34**: E2393–E2402.  
407 <http://doi.wiley.com/10.1002/humu.22376> (Accessed March 27, 2018).
- 408 Lohmann DR, Gallie BL. 1993. *Retinoblastoma*. <http://www.ncbi.nlm.nih.gov/pubmed/20301625>  
409 (Accessed May 21, 2018).
- 410 Ma X, Liu Y, Liu Y, Alexandrov LB, Edmonson MN, Gawad C, Zhou X, Li Y, Rusch MC, Easton

- 411 J, et al. 2018. Pan-cancer genome and transcriptome analyses of 1,699 paediatric  
412 leukaemias and solid tumours. *Nature* **555**: 371–376.  
413 <http://www.nature.com/doi/10.1038/nature25795> (Accessed March 27, 2018).
- 414 Margraf RL, Crockett DK, Krautscheid PMF, Seamons R, Calderon FRO, Wittwer CT, Mao R.  
415 2009. Multiple endocrine neoplasia type 2 *RET* protooncogene database: Repository of  
416 MEN2-associated *RET* sequence variation and reference for genotype/phenotype  
417 correlations. *Hum Mutat* **30**: 548–556. <http://www.ncbi.nlm.nih.gov/pubmed/19177457>  
418 (Accessed May 18, 2018).
- 419 Masica DL, Douville C, Tokheim C, Bhattacharya R, Kim R, Moad K, Ryan MC, Karchin R.  
420 2017. CRAVAT 4: Cancer-Related Analysis of Variants Toolkit. *Cancer Res* **77**: e35–e38.  
421 <http://www.ncbi.nlm.nih.gov/pubmed/29092935> (Accessed April 2, 2018).
- 422 McLaren W, Gil L, Hunt SE, Riat HS, Ritchie GRS, Thormann A, Flicek P, Cunningham F. 2016.  
423 The Ensembl Variant Effect Predictor. *Genome Biol* **17**: 122.  
424 <http://genomebiology.biomedcentral.com/articles/10.1186/s13059-016-0974-4> (Accessed  
425 March 27, 2018).
- 426 McLendon R, Friedman A, Bigner D, Van Meir EG, Brat DJ, M. Mastrogiannakis G, Olson JJ,  
427 Mikkelsen T, Lehman N, Aldape K, et al. 2008. Comprehensive genomic characterization  
428 defines human glioblastoma genes and core pathways. *Nature* **455**: 1061–1068.  
429 <http://www.ncbi.nlm.nih.gov/pubmed/18772890> (Accessed May 18, 2018).
- 430 Moriyama T, Metzger ML, Wu G, Nishii R, Qian M, Devidas M, Yang W, Cheng C, Cao X, Quinn  
431 E, et al. 2015. Germline genetic variation in *ETV6* and risk of childhood acute  
432 lymphoblastic leukaemia: a systematic genetic study. *Lancet Oncol* **16**: 1659–1666.  
433 <http://www.ncbi.nlm.nih.gov/pubmed/26522332> (Accessed March 27, 2018).
- 434 Ng SB, Turner EH, Robertson PD, Flygare SD, Bigham AW, Lee C, Shaffer T, Wong M,



- 435           Bhattacharjee A, Eichler EE, et al. 2009. Targeted capture and massively parallel  
436           sequencing of 12 human exomes. *Nature* **461**: 272–276.  
437           <http://www.ncbi.nlm.nih.gov/pubmed/19684571> (Accessed March 30, 2018).
- 438   Patel RY, Shah N, Jackson AR, Ghosh R, Pawliczek P, Paithankar S, Baker A, Riehle K, Chen  
439           H, Milosavljevic S, et al. 2017. ClinGen Pathogenicity Calculator: a configurable system for  
440           assessing pathogenicity of genetic variants. *Genome Med.*
- 441   Podlevsky JD, Bley CJ, Omana R V., Qi X, Chen JJ-L. 2007. The Telomerase Database.  
442           *Nucleic Acids Res* **36**: D339–D343. <http://www.ncbi.nlm.nih.gov/pubmed/18073191>  
443           (Accessed May 18, 2018).
- 444   Rahman N. 2014. Realizing the promise of cancer predisposition genes. *Nature*.
- 445   Richards S, Aziz N, Bale S, Bick D, Das S, Gastier-Foster J, Grody WW, Hegde M, Lyon E,  
446           Spector E, et al. 2015. Standards and guidelines for the interpretation of sequence  
447           variants: a joint consensus recommendation of the American College of Medical Genetics  
448           and Genomics and the Association for Molecular Pathology. *Genet Med.*
- 449   Shah S, Schrader KA, Waanders E, Timms AE, Vijai J, Miething C, Wechsler J, Yang J, Hayes  
450           J, Klein RJ, et al. 2013. A recurrent germline PAX5 mutation confers susceptibility to pre-B  
451           cell acute lymphoblastic leukemia. *Nat Genet* **45**: 1226–1231.  
452           <http://www.ncbi.nlm.nih.gov/pubmed/24013638> (Accessed May 6, 2018).
- 453   Soudon J, Caron de Fromental C, Bernard O, Larsen CJ. 1991. Inactivation of the p53 gene  
454           expression by a splice donor site mutation in a human T-cell leukemia cell line. *Leukemia*  
455           **5**: 917–20. <http://www.ncbi.nlm.nih.gov/pubmed/1961027> (Accessed March 27, 2018).
- 456   Szabo C, Masiello A, Ryan JF, Brody LC. 2000. The Breast Cancer Information Core: Database  
457           design, structure, and scope. *Hum Mutat* **16**: 123–131.

- 458 <http://www.ncbi.nlm.nih.gov/pubmed/10923033> (Accessed April 4, 2018).
- 459 Ta EN. 2017. CIViC is a community knowledgebase for expert crowdsourcing the clinical  
460 interpretation of variants in cancer. *Nat Publ Gr* **49**.
- 461 Taylor JP, Brown RH, Cleveland DW. 2016. Decoding ALS: from genes to mechanism. *Nature*  
462 **539**: 197–206. <http://www.ncbi.nlm.nih.gov/pubmed/27830784> (Accessed May 3, 2018).
- 463 Wang K, Li M, Hakonarson H. 2010. ANNOVAR: functional annotation of genetic variants from  
464 high-throughput sequencing data. *Nucleic Acids Res* **38**: e164.  
465 <http://www.ncbi.nlm.nih.gov/pubmed/20601685> (Accessed March 27, 2018).
- 466 Wang Z, Wilson CL, Easton J, Thrasher A, Mulder H, Liu Q, Hedges D, Wang S, Rusch M,  
467 Edmonson M, et al. 2018. Genetic Risk for Subsequent Neoplasms among Long-term  
468 Survivors of Childhood Cancer. *J Clin Oncol*.
- 469 Zhang J, Walsh MF, Wu G, Edmonson MN, Gruber TA, Easton J, Hedges D, Ma X, Zhou X,  
470 Yergeau DA, et al. 2015. Germline Mutations in Predisposition Genes in Pediatric Cancer.  
471 *N Engl J Med*.
- 472 Zhao M, Kim P, Mitra R, Zhao J, Zhao Z. 2016. TSGene 2.0: an updated literature-based  
473 knowledgebase for tumor suppressor genes. *Nucleic Acids Res* **44**: D1023–D1031.  
474 <http://www.ncbi.nlm.nih.gov/pubmed/26590405> (Accessed May 23, 2018).
- 475 Zhou X, Edmonson MN, Wilkinson MR, Patel A, Wu G, Liu Y, Li Y, Zhang Z, Rusch MC, Parker  
476 M, et al. 2015. Exploring genomic alteration in pediatric cancer using ProteinPaint. *Nat*  
477 *Genet* **48**.
- 478 Zook JM, Chapman B, Wang J, Mittelman D, Hofmann O, Hide W, Salit M. 2014. Integrating  
479 human sequence data sets provides a resource of benchmark SNP and indel genotype  
480 calls. *Nat Biotechnol* **32**: 246–251. <http://www.nature.com/articles/nbt.2835> (Accessed

481            March 27, 2018).

482
